# Supplementary material
Source: Springer Nature journal article supplement (https://www.springermedizin.de/resource/supplementary/13058_2013_3552_MOESM1_ESM.pdf/9703940)

A

| FACS antibody | species | vol per 250µl | Supplier         | catalog number | fluorophore  |
|---------------|---------|---------------|------------------|----------------|--------------|
| CD24          | rat     | 6µl           | eBioscience      | 93-0242-41     | eFluor 605NC |
| CD49b         | hamster | 1µl           | Becton Dickinson | 558759         | PE           |
| CD49f         | rat     | 0.5µl         | Becton Dickinson | 551129         | PE-Cy5       |
| CD45          | rat     | 0.5µl         | Becton Dickinson | 550944         | Per CP-Cy5.5 |
| Sca1          | rat     | 1.5µl         | Becton Dickinson | 558162         | PE-Cy7       |

B

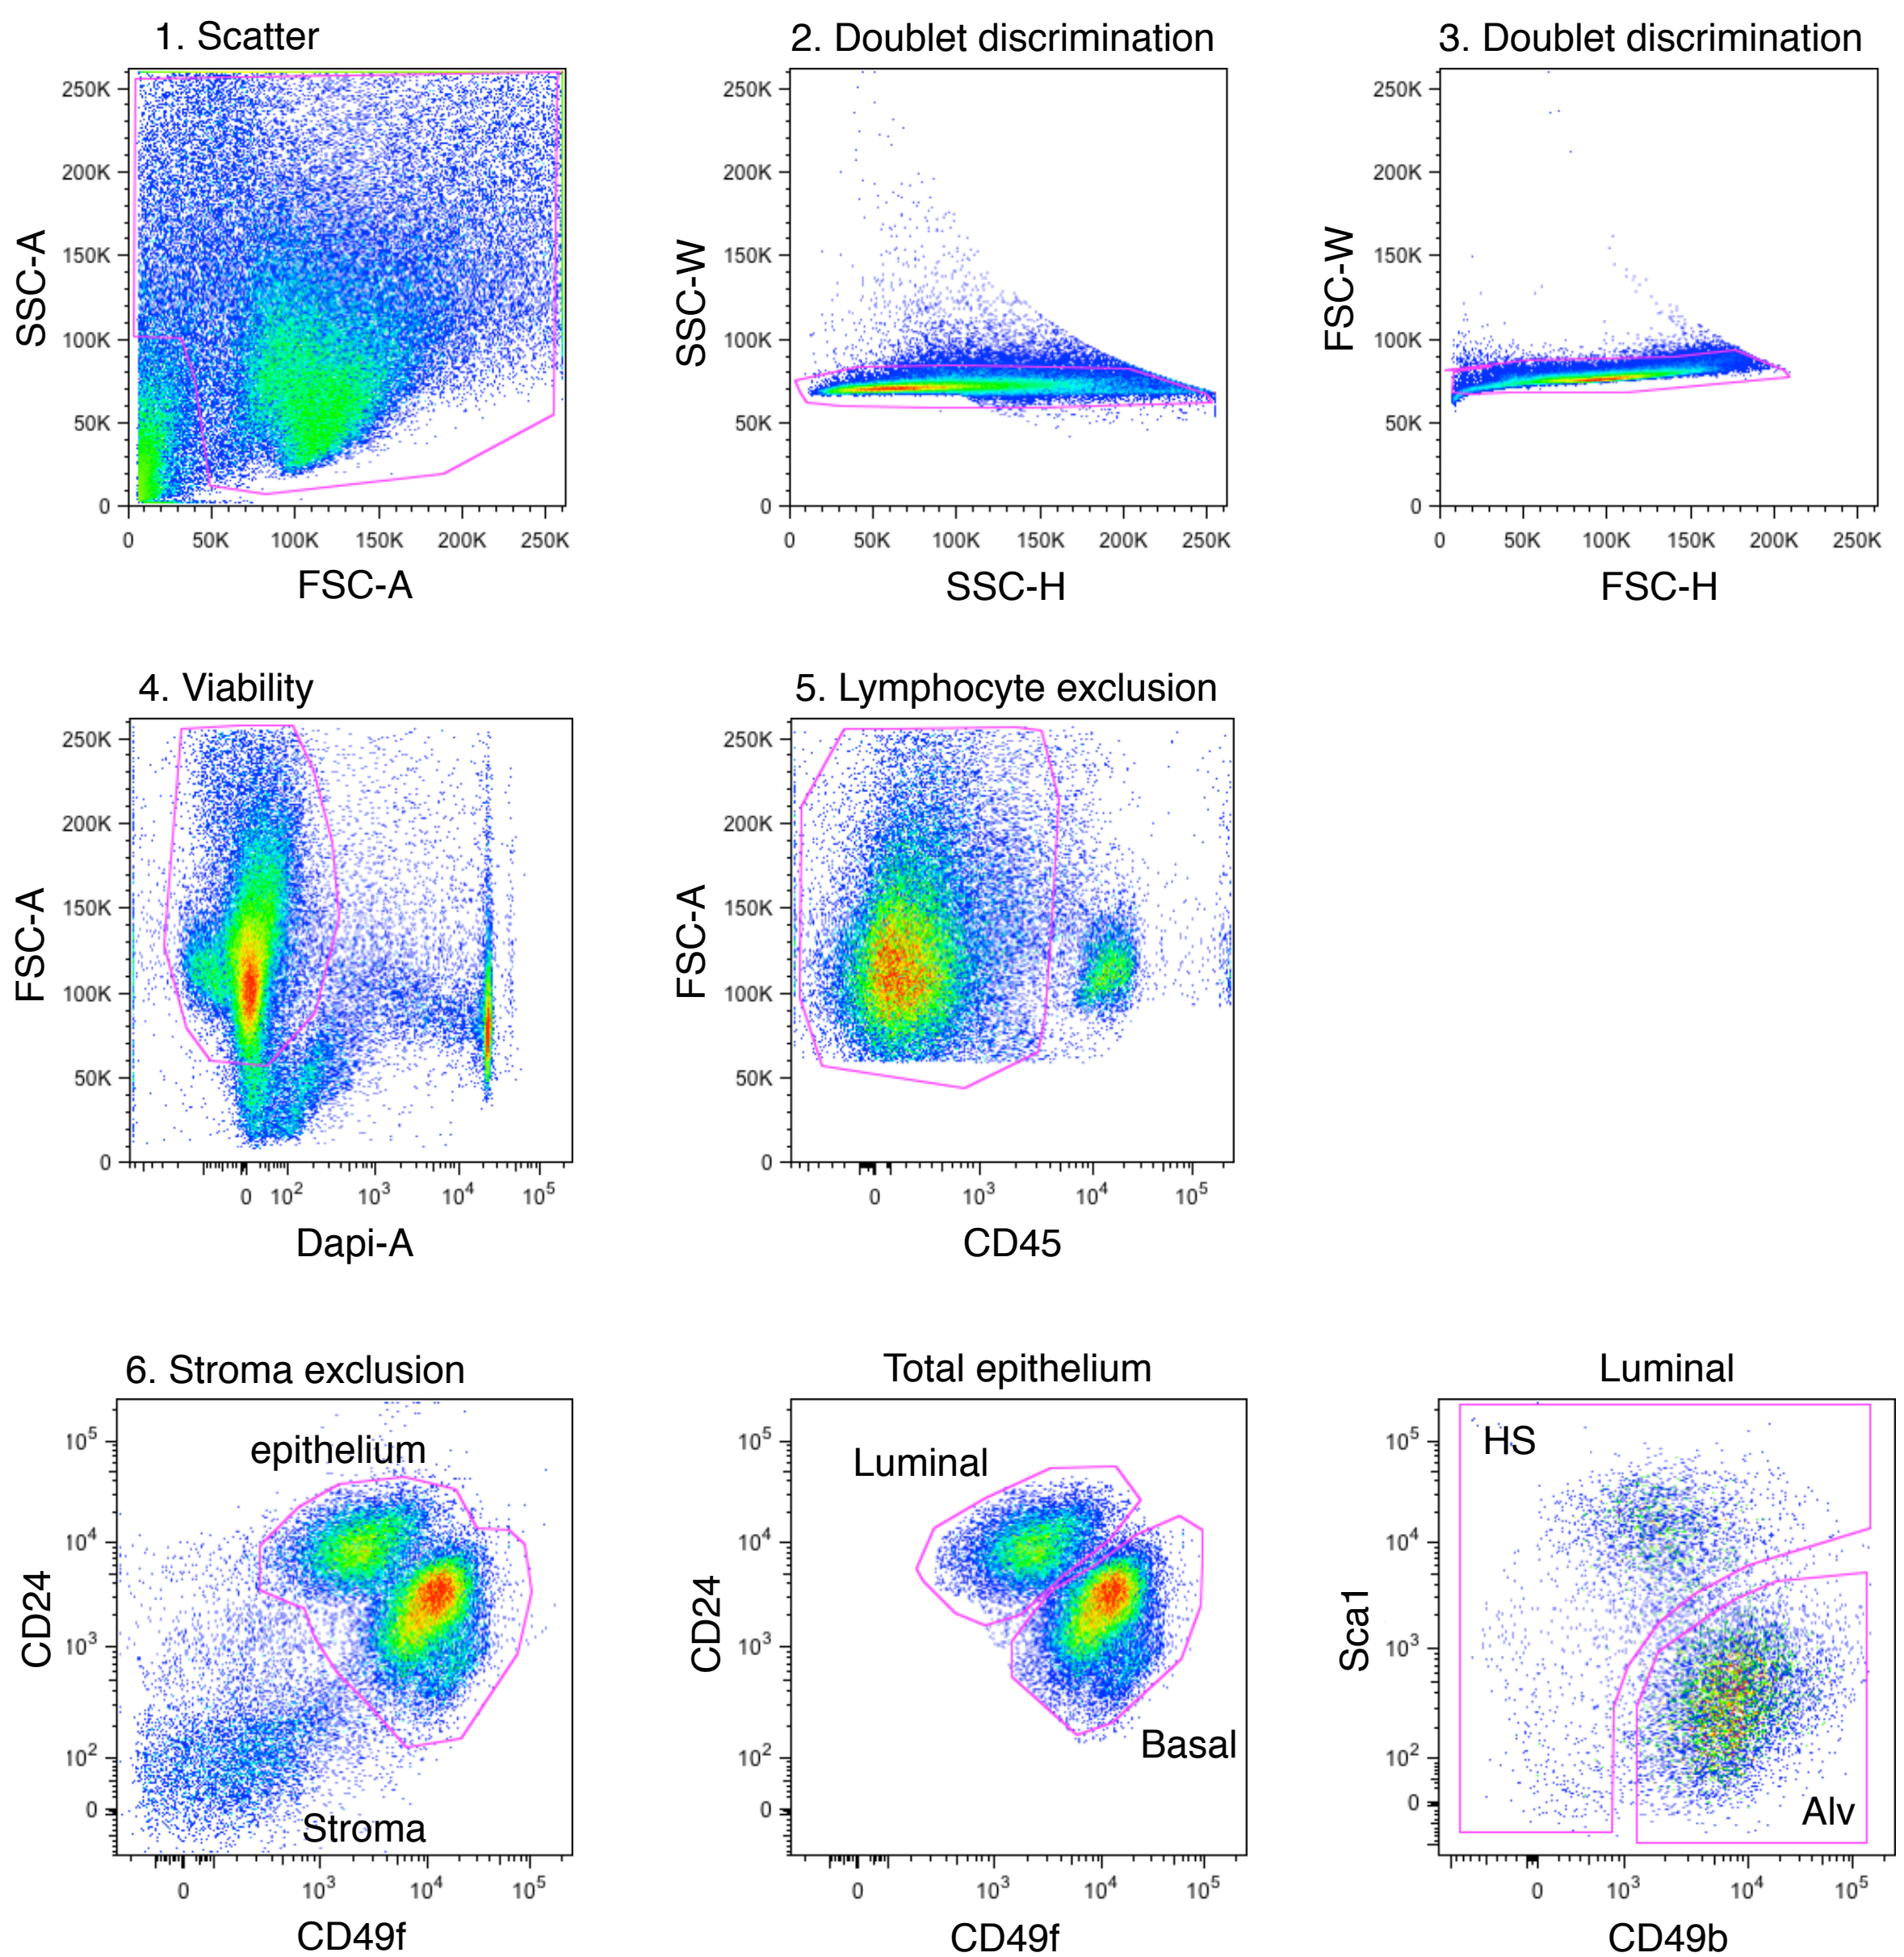

Supplement: MOESM1 [file 9703940]
